# Supplementary material
Source: PubMed Central journal article supplement (PMC3561795)
Supplement: JCI61110sd.pdf [file JCI61110sd.pdf]

## Supplemental Data Information - Ronzaud *et al.*

### Supplemental methods

*Genotyping and recombination PCR.* Genotyping and recombination PCR were performed on DNA extracted from tail, kidney and liver as described in (1, 2).

*Immunoblotting.* NEDD4-2 was detected using antibodies against the amino acids 110-226 (3) diluted 1/1000, or 300-376 (Abcam) diluted 1/500, or the residues surrounding the amino acid 151 (Cell Signaling) (4) diluted 1/1000. NEDD4-1 and  $\beta$ -actin were detected using an anti-NEDD4-1 (5) diluted 1:500 and an anti-actin (Sigma) diluted 1:1000, respectively.

### Supplemental references

1. Shi, P.P., Cao, X.R., Sweezer, E.M., Kinney, T.S., Williams, N.R., Husted, R.F., Nair, R., Weiss, R.M., Williamson, R.A., Sigmund, C.D., et al. 2008. Salt-sensitive hypertension and cardiac hypertrophy in mice deficient in the ubiquitin ligase Nedd4-2. *Am J Physiol Renal Physiol* 295:F462-470.
2. Traykova-Brauch, M., Schonig, K., Greiner, O., Miloud, T., Jauch, A., Bode, M., Felsher, D.W., Glick, A.B., Kwiatkowski, D.J., Bujard, H., et al. 2008. An efficient and versatile system for acute and chronic modulation of renal tubular function in transgenic mice. *Nat Med* 14:979-984.
3. Boase, N.A., Rychkov, G.Y., Townley, S.L., Dinudom, A., Candi, E., Voss, A.K., Tsoutsman, T., Semsarian, C., Melino, G., Koentgen, F., et al. 2011. Respiratory distress and perinatal lethality in Nedd4-2-deficient mice. *Nat Commun* 2:287.
4. Kimura, T., Kawabe, H., Jiang, C., Zhang, W., Xiang, Y.Y., Lu, C., Salter, M.W., Brose, N., Lu, W.Y., and Rotin, D. 2011. Deletion of the ubiquitin ligase Nedd4L in lung epithelia causes cystic fibrosis-like disease. *Proc Natl Acad Sci U S A* 108:3216-3221.
5. Staub, O., Dho, S., Henry, P.C., Correa, J., Ishikawa, T., McGlade, J., and Rotin, D. 1996. WW domains of Nedd4 bind to the proline-rich PY motifs in the epithelial Na<sup>+</sup> channel deleted in Liddle's syndrome. *EMBO J.* 15:2371-2380.

## Supplemental figures and legends

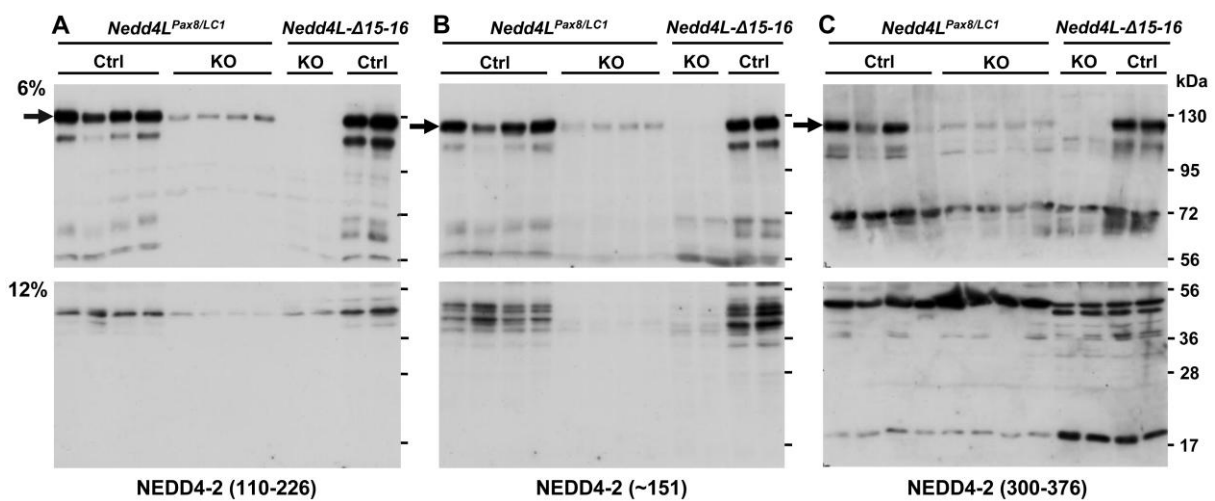

**Figure S1**

**Detailed analysis of NEDD4-2 protein loss in *Nedd4L*<sup>Pax8/LC1</sup> KO mice using different NEDD4-2 antibodies.** Western blots for NEDD4-2 were performed on whole kidney extracts from control and *Nedd4L*<sup>Pax8/LC1</sup> KO mice using different antibodies against either the amino acids 110-226 (A), or the residues surrounding the amino acid 151 (B), or the amino acids 300-376 (C). Samples were loaded on 6% and 12% polyacrylamide gels to detect high as well as low molecular weight products. Kidney extracts from P19-old total *Nedd4L*-Δ15-16 KO mice were used as negative controls. Arrows indicate the specific 130-kDa NEDD4-2 band that was recognized by all antibodies and that was lost in the total KO but remained in the *Nedd4L*<sup>Pax8/LC1</sup> KO mice at low levels. Ctrl: control mice.

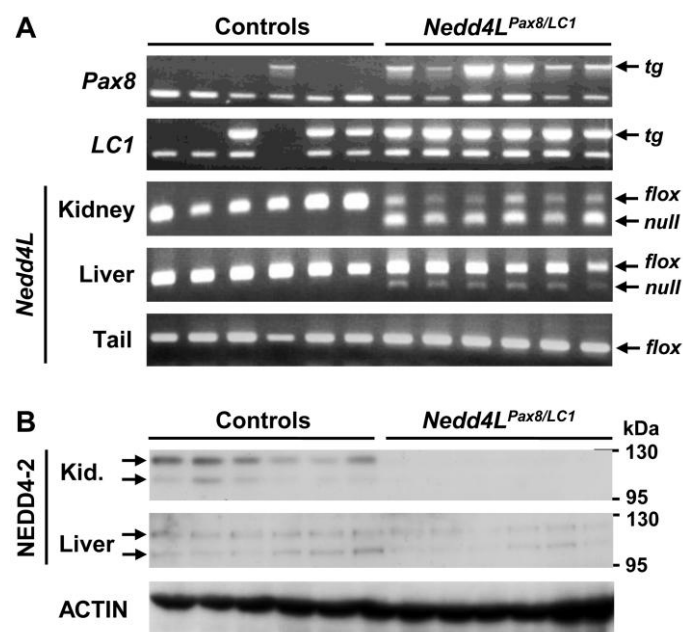

**Figure S2**

*Nedd4L*<sup>Pax8/LC1</sup> KO mice show recombination of the *Nedd4L* floxed allele in liver. (A) PCRs on DNA extracted from kidney, liver and tail show recombination (null band) in kidney as well as in liver of doxycycline-treated *Nedd4L*<sup>Pax8/LC1</sup> KO mice. (B) However, a significant amount of NEDD4-2 protein was still detected in liver of KO mice. Tg: *Pax8-rTA* or *LC1* transgenic band; flox: *Nedd4L* floxed allele band; null: recombined *Nedd4L* allele band.

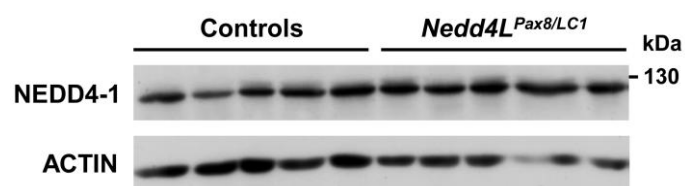

**Figure S3**

*Nedd4L*<sup>Pax8/LC1</sup> KO mice show normal NEDD4-1 abundance in the kidney. Western blot analysis on kidney from control and *Nedd4L*<sup>Pax8/LC1</sup> KO mice shows unchanged NEDD4-1 protein expression.

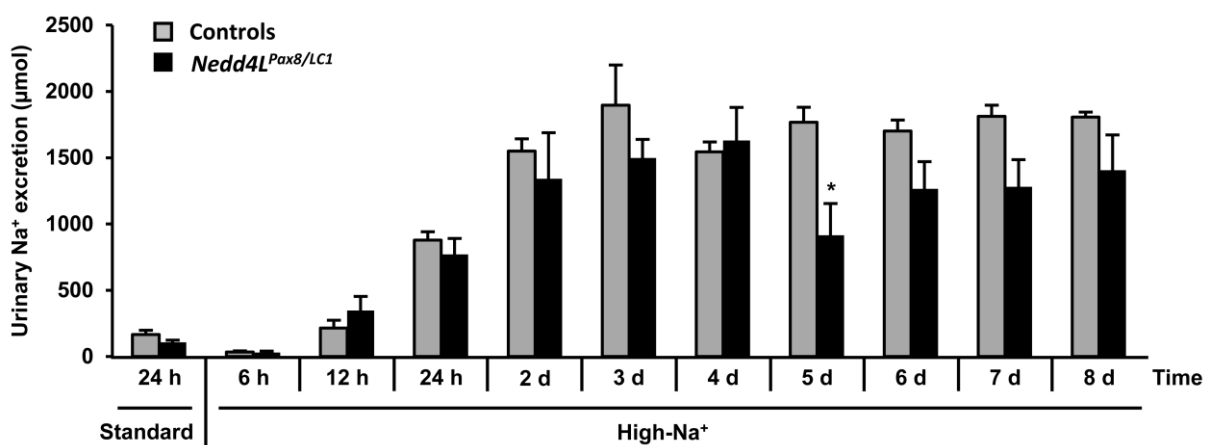

**Figure S4**

***Nedd4L<sup>Pax8/LC1</sup>* KO mice do not display any sign of Na<sup>+</sup> retention after switch to high-Na<sup>+</sup> diet.** After equilibration on a standard diet, control (n = 4) and *Nedd4L<sup>Pax8/LC1</sup>* KO (n = 4) mice were fed a high-Na<sup>+</sup> diet and Na<sup>+</sup> excretion was measured after 6 h, 12 h, 24 h and then daily. Despite a tendency to retain Na<sup>+</sup>, KO mice did not show any significant difference in Na<sup>+</sup> excretion compared to control mice, except at day 5. \*P<0.05, KO versus controls.

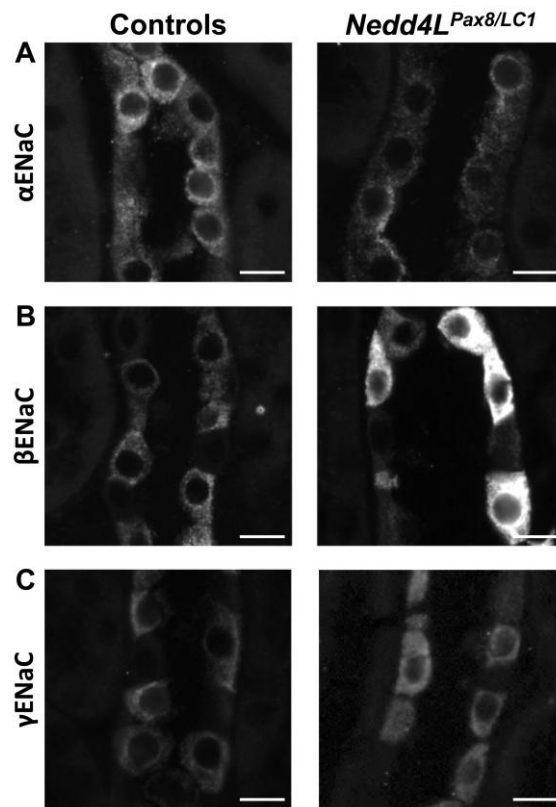

**Figure S5**

**Immunofluorescence for  $\alpha$ -,  $\beta$ - and  $\gamma$ ENaC protein expression.** High magnification of immunostaining for  $\alpha$ - (A),  $\beta$ - (B) and  $\gamma$ ENaC (C) on kidney cryosections of control and *Nedd4L<sup>Pax8/LC1</sup>* KO mice under high- $\text{Na}^+$  diet. Cytoplasmic  $\beta$ - and  $\gamma$ ENaC abundance is increased in CD of KO, whereas  $\alpha$ ENaC is not. Scale bars  $\sim 10\ \mu\text{m}$ .

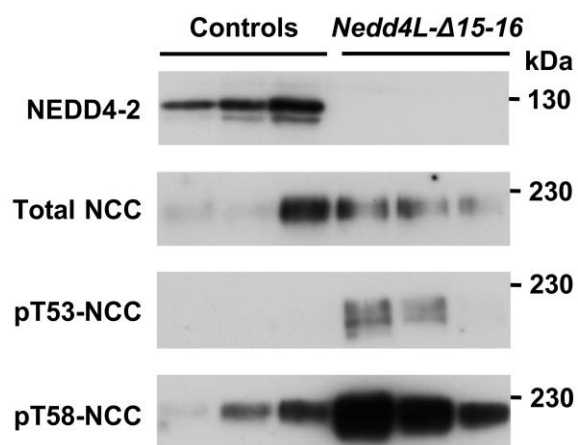

**Figure S6**

**NCC abundance and phosphorylation is increased in the total *Nedd4L-Δ15-16* KO mice.** Western blot analysis on kidney from control and total *Nedd4L-Δ15-16* KO mice from Kumar shows increased NCC protein expression and phosphorylation.

## Supplemental table

| Gene           | Assay ID or primer/probe sequences                                                                         |
|----------------|------------------------------------------------------------------------------------------------------------|
| <i>Aqp2</i>    | Mm00437575_m1                                                                                              |
| <i>Scnn1a</i>  | Mm00803386_m1                                                                                              |
| <i>Scnn1b</i>  | Forward: GGGTGCTGGTGGACAAGC<br>Reverse: ATGTGGTCTTGGAACAGGAATG<br>Probe: CAGTCCCTGCACCATGAACGGCT           |
| <i>Scnn1g</i>  | Forward: AACCTTACAGCCAGTGCACAGA<br>Reverse: TTGGAAGCATGAGTAAAGGCAG<br>Probe: AGCGATGTGCCCCGTCACAAACATCT    |
| <i>Gapdh</i>   | Mm99999915_g1                                                                                              |
| <i>Slc12a3</i> | Mm00490213_m1                                                                                              |
| <i>Nedd4L</i>  | Mm01258749_m1                                                                                              |
| <i>Kcnj1</i>   | Forward: ACGGATTCAGGTTTGTGACAG<br>Reverse: GATCACTCCAAGAATAGACTGGAAGA<br>Probe: CAGTGTGCCACTGCCATTTTCTGCTT |

**Table S1.** TaqMan Gene Expression Assay ID numbers (Applied Biosystems) or sequences of primers and probes for real-time quantitative PCR.
